# Supplementary material for: Are Cry Studies Replicable? An Analysis of Participants, Setups, and Methods Adopted and Reported in Cry Studies
Source: Preprints.org preprint supplement (doi:10.20944/preprints201911.0176.v1), 2019-11-15
Supplement: Supplementary file 1 [file supplementary]

|    | Authors                       | Year | Part | Samp | Age | Sex | Tri | Pos | Hea | Mic | MTM | Env | SR | FF | PP | SfHw | FE | FR | Ww | AF |
|----|-------------------------------|------|------|------|-----|-----|-----|-----|-----|-----|-----|-----|----|----|----|------|----|----|----|----|
| 1  | Abou-Abbas L. et al. [1]      | 2015 | Y    | Y    | Y   | Y   | N   | N   | Y   | Y   | Y   | Y   | Y  | Y  | N  | Y    | Y  | N  | N  | Y  |
| 2  | Abou-Abbas L. et al. [2]      | 2015 | Y    | Y    | Y   | N   | N   | N   | Y   | N   | Y   | Y   | Y  | N  | N  | N    | Y  | N  | N  | Y  |
| 3  | Abou-Abbas L. et al. [3]      | 2017 | Y    | Y    | N   | Y   | N   | N   | N   | N   | N   | N   | Y  | N  | N  | Y    | Y  | N  | N  | N  |
| 4  | Alaie H. F. et al. [4]        | 2015 | Y    | Y    | Y   | Y   | N   | N   | Y   | Y   | Y   | Y   | Y  | Y  | Y  | N    | Y  | N  | Y  | Y  |
| 5  | Amaro-Camargo E. et al. [5]   | 2007 | N    | N    | N   | N   | N   | N   | Y   | N   | N   | N   | N  | N  | Y  | Y    | Y  | N  | Y  | N  |
| 6  | Bae J. H. et al. [6]          | 2017 | N    | N    | N   | N   | N   | N   | Y   | N   | N   | N   | Y  | N  | N  | Y    | Y  | N  | N  | Y  |
| 7  | Baeck H. E. et al. [7]        | 2001 | Y    | Y    | Y   | N   | Y   | N   | Y   | Y   | Y   | N   | Y  | N  | Y  | Y    | N  | Y  | Y  | Y  |
| 8  | Baeck H. E. et al. [8]        | 2003 | N    | Y    | N   | N   | Y   | N   | Y   | N   | N   | N   | N  | N  | N  | N    | Y  | N  | N  | Y  |
| 9  | Baeck H. E. et al. [9]        | 2017 | Y    | Y    | Y   | Y   | Y   | N   | Y   | Y   | Y   | N   | Y  | N  | Y  | Y    | N  | N  | N  | Y  |
| 10 | Basak A. et al. [10]          | 2011 | N    | Y    | N   | N   | N   | N   | Y   | N   | N   | N   | Y  | N  | Y  | Y    | Y  | N  | N  | N  |
| 11 | Bisping R. et al. [11]        | 1990 | Y    | N    | Y   | N   | Y   | N   | Y   | Y   | Y   | Y   | N  | Y  | N  | Y    | Y  | N  | N  | N  |
| 12 | Borysiak A. et al. [12]       | 2017 | Y    | Y    | Y   | Y   | Y   | N   | Y   | Y   | Y   | Y   | Y  | N  | Y  | Y    | Y  | N  | N  | Y  |
| 13 | Boukydis C. F. Z. et al. [13] | 1998 | Y    | N    | N   | N   | Y   | Y   | Y   | Y   | Y   | Y   | N  | Y  | N  | N    | N  | N  | N  | Y  |
| 14 | Branco A. et al. [14]         | 2005 | Y    | N    | Y   | N   | N   | N   | Y   | Y   | Y   | Y   | Y  | N  | Y  | Y    | Y  | N  | N  | Y  |
| 15 | Branco A. et al. [15]         | 2007 | Y    | N    | Y   | N   | Y   | N   | Y   | Y   | Y   | Y   | N  | N  | N  | Y    | Y  | N  | N  | Y  |
| 16 | Cacace A. T. et al. [16]      | 1995 | Y    | Y    | N   | N   | Y   | Y   | Y   | Y   | Y   | Y   | Y  | Y  | Y  | Y    | Y  | N  | N  | Y  |
| 17 | Cano S. et al. [17]           | 2006 | Y    | Y    | N   | N   | N   | N   | N   | N   | N   | N   | N  | N  | Y  | Y    | Y  | N  | N  | Y  |
| 18 | Canoortiz S et al. [18]       | 2003 | Y    | Y    | N   | N   | Y   | N   | Y   | N   | N   | N   | N  | N  | N  | Y    | N  | N  | N  | Y  |
| 19 | Cecchini M. et al. [19]       | 2010 | Y    | Y    | Y   | N   | Y   | N   | Y   | Y   | Y   | N   | N  | N  | N  | Y    | Y  | N  | N  | N  |
| 20 | Chittora A. et al. [20]       | 2013 | Y    | Y    | Y   | Y   | Y   | Y   | Y   | Y   | Y   | Y   | Y  | Y  | N  | N    | Y  | N  | N  | Y  |
| 21 | Chittora A. et al. [21]       | 2014 | Y    | Y    | N   | N   | Y   | N   | Y   | N   | N   | N   | Y  | N  | Y  | Y    | Y  | N  | Y  | N  |
| 22 | Chittora A. et al. [22]       | 2016 | Y    | Y    | N   | N   | Y   | N   | Y   | N   | N   | Y   | Y  | N  | Y  | Y    | Y  | N  | Y  | Y  |
| 23 | Chittora A. et al. [23]       | 2017 | Y    | Y    | Y   | Y   | Y   | N   | Y   | Y   | N   | N   | Y  | N  | N  | N    | Y  | N  | N  | Y  |
| 24 | Cismaresco A. S. et al. [24]  | 1990 | Y    | Y    | Y   | Y   | N   | Y   | Y   | Y   | Y   | Y   | N  | Y  | N  | Y    | N  | Y  | N  | Y  |
| 25 | Colton R. H. et al. [25]      | 1981 | Y    | Y    | Y   | Y   | Y   | N   | Y   | Y   | Y   | Y   | N  | Y  | N  | Y    | Y  | N  | N  | Y  |
| 26 | Corwin M. J. et al. [26]      | 1992 | Y    | Y    | N   | N   | Y   | N   | Y   | Y   | N   | Y   | Y  | Y  | Y  | Y    | Y  | N  | Y  | Y  |
| 27 | De Pisapia N. et al. [27]     | 2013 | Y    | Y    | Y   | Y   | Y   | N   | Y   | N   | N   | Y   | N  | N  | N  | Y    | Y  | N  | N  | Y  |
| 28 | Esposito G. et al. [28]       | 2010 | Y    | Y    | Y   | Y   | N   | Y   | Y   | Y   | Y   | Y   | Y  | N  | N  | Y    | Y  | Y  | N  | Y  |
| 29 | Esposito G. et al. [29]       | 2010 | Y    | Y    | Y   | Y   | Y   | N   | Y   | N   | N   | Y   | N  | N  | N  | Y    | Y  | N  | N  | Y  |
| 30 | Esposito G. et al. [30]       | 2013 | Y    | Y    | Y   | Y   | N   | N   | Y   | N   | N   | Y   | Y  | N  | Y  | Y    | Y  | N  | N  | Y  |
| 31 | Esposito G. et al. [31]       | 2014 | Y    | Y    | Y   | Y   | Y   | N   | Y   | N   | N   | N   | Y  | N  | Y  | Y    | Y  | N  | N  | Y  |
| 32 | Esposito G. et al. [32]       | 2015 | Y    | N    | Y   | Y   | N   | N   | Y   | N   | N   | Y   | Y  | N  | N  | Y    | Y  | N  | N  | Y  |
| 33 | Esposito G. et al. [33]       | 2017 | Y    | N    | Y   | Y   | N   | N   | Y   | N   | N   | Y   | Y  | N  | Y  | Y    | Y  | Y  | N  | Y  |
| 34 | Etz T. et al. [34]            | 2012 | Y    | Y    | Y   | N   | Y   | Y   | Y   | Y   | Y   | Y   | N  | N  | Y  | Y    | Y  | N  | N  | Y  |
| 35 | Fort A. et al. [35]           | 1998 | Y    | N    | Y   | N   | N   | N   | Y   | N   | N   | Y   | Y  | N  | N  | Y    | Y  | N  | Y  | Y  |
| 36 | Fuamenya N. A. et al. [36]    | 2015 | Y    | Y    | Y   | Y   | Y   | Y   | Y   | Y   | Y   | Y   | N  | N  | Y  | Y    | Y  | N  | N  | Y  |
| 37 | Fuller B. F. et al. [37]      | 1988 | Y    | Y    | Y   | N   | Y   | N   | Y   | N   | Y   | Y   | Y  | Y  | Y  | N    | Y  | Y  | N  | Y  |
| 38 | Fuller B. F. et al. [38]      | 1991 | Y    | Y    | Y   | Y   | Y   | Y   | Y   | N   | Y   | N   | Y  | Y  | Y  | Y    | Y  | Y  | N  | Y  |
| 39 | Fuller B. F. et al. [39]      | 1994 | Y    | Y    | Y   | Y   | N   | N   | Y   | Y   | Y   | N   | Y  | Y  | N  | Y    | Y  | Y  | N  | Y  |
| 40 | Fuller B. F. et al. [40]      | 1995 | Y    | N    | Y   | N   | Y   | N   | Y   | Y   | N   | Y   | Y  | N  | Y  | Y    | Y  | N  | N  | Y  |
| 41 | Galaviz O. F. R. et al. [41]  | 2004 | N    | Y    | N   | N   | N   | N   | Y   | N   | N   | N   | N  | N  | Y  | Y    | Y  | N  | N  | N  |
| 42 | García J. O. et al. [42]      | 2003 | Y    | Y    | Y   | N   | N   | N   | Y   | Y   | N   | N   | Y  | N  | Y  | Y    | Y  | N  | Y  | Y  |
| 43 | Gerber S. E. et al. [43]      | 1985 | Y    | N    | Y   | Y   | Y   | Y   | Y   | Y   | Y   | Y   | N  | Y  | Y  | Y    | Y  | N  | N  | Y  |
| 44 | Gerber S. E. et al. [44]      | 1987 | Y    | Y    | N   | N   | N   | N   | Y   | N   | N   | N   | Y  | N  | N  | Y    | Y  | N  | N  | N  |

Table 1 continued from previous page

| Authors                        | Year | Part | Samp | Age | Sex | Tri | Pos | Hea | Mic | MTM | Env | SR | FF | PP | SfHw | FE | FR | Ww | AF |
|--------------------------------|------|------|------|-----|-----|-----|-----|-----|-----|-----|-----|----|----|----|------|----|----|----|----|
| 45 Gilbert H. R. et al. [45]   | 1996 | Y    | Y    | Y   | Y   | Y   | Y   | Y   | Y   | Y   | Y   | N  | N  | Y  | Y    | Y  | N  | N  | Y  |
| 46 Gberman A. M. et al. [46]   | 1999 | Y    | N    | N   | Y   | Y   | Y   | Y   | Y   | Y   | N   | Y  | Y  | Y  | Y    | Y  | Y  | Y  | Y  |
| 47 Gberman A. M. et al. [47]   | 2005 | Y    | Y    | Y   | Y   | Y   | Y   | Y   | N   | Y   | Y   | N  | N  | Y  | Y    | Y  | Y  | Y  | Y  |
| 48 Gberman A. M. et al. [48]   | 2008 | Y    | Y    | Y   | Y   | Y   | Y   | Y   | Y   | Y   | Y   | Y  | N  | Y  | Y    | Y  | Y  | N  | Y  |
| 49 Golub H. L. et al. [49]     | 1982 | Y    | N    | Y   | N   | Y   | Y   | Y   | Y   | Y   | Y   | N  | Y  | N  | N    | N  | N  | N  | Y  |
| 50 Grau S. M. et al. [50]      | 1995 | Y    | N    | Y   | Y   | Y   | Y   | Y   | Y   | Y   | Y   | Y  | Y  | N  | Y    | N  | N  | N  | Y  |
| 51 Green J. A. et al. [51]     | 1990 | Y    | Y    | Y   | N   | Y   | N   | Y   | N   | N   | N   | N  | N  | N  | Y    | Y  | N  | Y  | Y  |
| 52 Green J. A. et al. [52]     | 1998 | Y    | N    | Y   | Y   | Y   | Y   | Y   | Y   | Y   | Y   | N  | Y  | N  | Y    | Y  | N  | N  | Y  |
| 53 Grunau R. V. E. et al. [53] | 1990 | Y    | N    | N   | Y   | Y   | N   | Y   | Y   | Y   | Y   | Y  | Y  | Y  | N    | Y  | N  | N  | Y  |
| 54 Gustafson G. E. et al. [54] | 1984 | Y    | Y    | Y   | N   | Y   | N   | Y   | Y   | Y   | Y   | Y  | Y  | N  | Y    | N  | Y  | N  | Y  |
| 55 Gustafson G. E. et al. [55] | 1989 | N    | Y    | Y   | N   | Y   | N   | Y   | Y   | Y   | Y   | N  | Y  | N  | Y    | Y  | N  | Y  | Y  |
| 56 Gustafson G. E. et al. [56] | 2017 | Y    | Y    | Y   | Y   | Y   | Y   | Y   | Y   | N   | Y   | Y  | N  | Y  | Y    | Y  | Y  | N  | Y  |
| 57 Hariharan M. et al. [57]    | 2011 | N    | Y    | N   | N   | N   | N   | Y   | N   | N   | N   | Y  | N  | N  | Y    | Y  | N  | N  | N  |
| 58 Hariharan M. et al. [58]    | 2010 | N    | Y    | N   | N   | N   | N   | Y   | N   | N   | N   | Y  | N  | Y  | N    | Y  | N  | Y  | Y  |
| 59 Hariharan M. et al. [59]    | 2012 | Y    | Y    | N   | N   | N   | N   | Y   | N   | N   | N   | Y  | N  | N  | Y    | Y  | N  | Y  | N  |
| 60 Hariharan M. et al. [60]    | 2012 | Y    | Y    | N   | N   | N   | N   | Y   | N   | N   | N   | Y  | N  | N  | Y    | Y  | N  | Y  | N  |
| 61 Hidayati R. et al. [61]     | 2009 | Y    | N    | Y   | N   | Y   | Y   | Y   | Y   | Y   | Y   | Y  | N  | N  | Y    | Y  | N  | N  | Y  |
| 62 Hirschberg J. et al. [62]   | 1980 | Y    | N    | N   | N   | Y   | N   | Y   | Y   | Y   | Y   | Y  | Y  | N  | Y    | Y  | Y  | N  | Y  |
| 63 Hirschberg J. et al. [63]   | 1990 | N    | Y    | N   | N   | Y   | N   | Y   | N   | Y   | N   | N  | N  | N  | Y    | Y  | N  | N  | Y  |
| 64 Honda K. et al. [64]        | 2012 | Y    | Y    | Y   | N   | N   | N   | Y   | N   | N   | Y   | Y  | N  | N  | N    | Y  | N  | Y  | Y  |
| 65 Huffman L. C. et al. [65]   | 1994 | Y    | N    | Y   | Y   | Y   | Y   | Y   | N   | Y   | Y   | Y  | Y  | Y  | Y    | Y  | N  | Y  | Y  |
| 66 Johnston C. C. et al. [66]  | 1999 | Y    | Y    | Y   | N   | Y   | N   | Y   | Y   | Y   | N   | Y  | N  | N  | Y    | N  | Y  | N  | Y  |
| 67 Jones M. C. et al. [67]     | 1971 | Y    | N    | Y   | N   | Y   | Y   | Y   | N   | N   | N   | N  | Y  | N  | Y    | Y  | N  | N  | Y  |
| 68 Joo C. U. et al. [68]       | 2015 | Y    | Y    | Y   | Y   | N   | N   | Y   | Y   | Y   | Y   | N  | N  | N  | Y    | N  | N  | N  | Y  |
| 69 Kelly T. et al. [69]        | 2017 | Y    | Y    | Y   | Y   | Y   | N   | Y   | Y   | Y   | Y   | Y  | N  | Y  | Y    | N  | N  | N  | Y  |
| 70 Kheddache Y. et al. [70]    | 2012 | Y    | Y    | N   | N   | Y   | N   | Y   | N   | Y   | Y   | Y  | N  | Y  | Y    | Y  | N  | N  | Y  |
| 71 Kheddache Y. et al. [71]    | 2015 | Y    | Y    | Y   | N   | Y   | N   | Y   | N   | Y   | Y   | Y  | N  | Y  | Y    | Y  | N  | N  | Y  |
| 72 Kitahara K. et al. [72]     | 2011 | Y    | Y    | Y   | N   | N   | N   | Y   | N   | N   | Y   | Y  | N  | N  | N    | Y  | N  | Y  | Y  |
| 73 Koutseff A. et al. [73]     | 2017 | Y    | Y    | Y   | Y   | Y   | N   | Y   | Y   | Y   | Y   | Y  | Y  | Y  | Y    | Y  | N  | N  | Y  |
| 74 Leger D. W. et al. [74]     | 1996 | Y    | Y    | Y   | N   | Y   | N   | Y   | Y   | N   | Y   | Y  | Y  | N  | Y    | N  | N  | N  | Y  |
| 75 Lenti Boero D. et al. [75]  | 1998 | Y    | N    | Y   | Y   | Y   | N   | Y   | Y   | Y   | Y   | Y  | Y  | Y  | Y    | Y  | N  | N  | Y  |
| 76 Lenti Boero D. et al. [76]  | 2000 | Y    | N    | Y   | Y   | N   | N   | Y   | Y   | Y   | Y   | Y  | Y  | Y  | Y    | N  | N  | N  | Y  |
| 77 Lester B. M. et al. [77]    | 1976 | Y    | Y    | Y   | Y   | Y   | N   | Y   | N   | Y   | N   | N  | Y  | N  | Y    | Y  | Y  | N  | Y  |
| 78 Lester B. M. et al. [78]    | 1979 | Y    | Y    | Y   | N   | Y   | Y   | Y   | Y   | Y   | Y   | N  | N  | N  | Y    | Y  | Y  | N  | Y  |
| 79 Lester B. M. et al. [79]    | 1987 | Y    | N    | Y   | N   | Y   | Y   | Y   | Y   | Y   | Y   | Y  | Y  | Y  | N    | Y  | N  | Y  | Y  |
| 80 Lester B. M. et al. [80]    | 1988 | Y    | Y    | Y   | N   | Y   | N   | Y   | Y   | Y   | Y   | Y  | Y  | Y  | Y    | Y  | N  | N  | Y  |
| 81 Lester B. M. et al. [81]    | 1989 | Y    | Y    | Y   | N   | Y   | Y   | Y   | N   | Y   | N   | Y  | Y  | Y  | N    | Y  | Y  | Y  | Y  |
| 82 Lester B. M. et al. [82]    | 1989 | Y    | Y    | Y   | N   | Y   | Y   | Y   | N   | Y   | Y   | Y  | N  | Y  | Y    | Y  | N  | Y  | Y  |
| 83 Lester B. M. et al. [83]    | 1992 | Y    | N    | Y   | N   | Y   | Y   | Y   | Y   | Y   | N   | Y  | Y  | Y  | Y    | Y  | N  | Y  | Y  |
| 84 Lester B. M. et al. [84]    | 1995 | Y    | N    | Y   | N   | Y   | Y   | Y   | Y   | Y   | Y   | N  | N  | N  | Y    | N  | N  | N  | Y  |
| 85 Lester B. M. et al. [85]    | 2002 | Y    | N    | Y   | N   | Y   | Y   | Y   | Y   | Y   | N   | Y  | N  | Y  | Y    | Y  | N  | Y  | Y  |
| 86 Lin H. et al. [86]          | 2007 | Y    | N    | Y   | Y   | Y   | Y   | Y   | Y   | Y   | N   | Y  | N  | N  | Y    | Y  | N  | Y  | Y  |
| 87 Lind K. et al. [87]         | 2002 | Y    | Y    | Y   | Y   | Y   | Y   | Y   | Y   | Y   | Y   | Y  | N  | Y  | Y    | Y  | N  | N  | Y  |

Table 1 continued from previous page

|     | Authors                           | Year | Part | Samp | Age | Sex | Tri | Pos | Hea | Mic | MTM | Env | SR | FF | PP | SfHw | FE | FR | Ww | AF |
|-----|-----------------------------------|------|------|------|-----|-----|-----|-----|-----|-----|-----|-----|----|----|----|------|----|----|----|----|
| 88  | Lounsbury M. L. et al. [88]       | 1982 | Y    | N    | Y   | N   | N   | N   | Y   | N   | Y   | Y   | Y  | Y  | N  | N    | Y  | N  | N  | Y  |
| 89  | Lüdge W. et al. [89]              | 1989 | Y    | N    | N   | N   | N   | N   | Y   | N   | N   | N   | N  | Y  | Y  | N    | Y  | N  | N  | Y  |
| 90  | Lundh P. et al. [90]              | 1986 | Y    | Y    | Y   | N   | N   | N   | Y   | N   | Y   | Y   | N  | N  | N  | N    | N  | Y  | Y  | Y  |
| 91  | Makó Z. et al. [91]               | 1970 | Y    | Y    | Y   | N   | N   | N   | N   | N   | N   | N   | N  | Y  | Y  | Y    | Y  | N  | N  | Y  |
| 92  | Manfredi C. et al. [92]           | 2008 | Y    | N    | N   | N   | N   | N   | Y   | Y   | Y   | Y   | N  | N  | N  | Y    | N  | N  | N  | Y  |
| 93  | Manfredi C. et al. [93]           | 2009 | Y    | Y    | N   | N   | N   | N   | Y   | Y   | N   | Y   | Y  | N  | Y  | Y    | Y  | Y  | Y  | Y  |
| 94  | Marasovich W. A. et al. [94]      | 1993 | Y    | N    | N   | Y   | N   | N   | Y   | N   | Y   | Y   | Y  | Y  | Y  | Y    | Y  | N  | N  | Y  |
| 95  | Massengill R. M. Jr. et al. [95]  | 1968 | Y    | N    | Y   | N   | Y   | Y   | Y   | Y   | Y   | Y   | Y  | Y  | Y  | N    | Y  | N  | N  | N  |
| 96  | Matsunaga S. et al. [96]          | 2006 | Y    | Y    | Y   | N   | N   | N   | Y   | N   | N   | Y   | Y  | N  | N  | N    | Y  | N  | Y  | N  |
| 97  | Messaoud A. et al. [97]           | 2010 | Y    | Y    | Y   | Y   | Y   | N   | Y   | Y   | N   | N   | Y  | Y  | Y  | Y    | Y  | Y  | Y  | Y  |
| 98  | Messaoud A. et al. [98]           | 2011 | Y    | Y    | Y   | N   | Y   | N   | Y   | Y   | N   | N   | Y  | N  | Y  | Y    | Y  | N  | Y  | Y  |
| 99  | Michelsson K. et al. [99]         | 1976 | Y    | Y    | Y   | N   | Y   | N   | Y   | Y   | N   | N   | N  | Y  | N  | Y    | Y  | N  | N  | Y  |
| 100 | Michelsson K. et al. [100]        | 1983 | Y    | Y    | Y   | N   | Y   | N   | Y   | Y   | N   | Y   | N  | Y  | N  | Y    | Y  | N  | N  | Y  |
| 101 | Mijovic B. et al. [101]           | 2010 | Y    | N    | Y   | N   | Y   | N   | Y   | N   | Y   | N   | Y  | N  | Y  | Y    | Y  | N  | N  | Y  |
| 102 | Mittal V. et al. [102]            | 2016 | Y    | N    | Y   | Y   | Y   | N   | Y   | Y   | Y   | Y   | Y  | N  | N  | N    | Y  | N  | N  | Y  |
| 103 | Murry T. et al. [103]             | 1977 | Y    | N    | N   | Y   | Y   | N   | Y   | N   | N   | N   | N  | Y  | Y  | Y    | Y  | N  | N  | Y  |
| 104 | Myakala P. R. et al. [104]        | 2018 | N    | N    | N   | N   | N   | N   | Y   | Y   | N   | N   | N  | N  | N  | N    | N  | N  | N  | N  |
| 105 | Naithani G. et al. [105]          | 2018 | Y    | Y    | Y   | N   | Y   | N   | Y   | Y   | Y   | Y   | Y  | Y  | N  | Y    | Y  | N  | Y  | Y  |
| 106 | Nugent J. K. et al. [106]         | 1996 | Y    | N    | Y   | N   | Y   | Y   | Y   | N   | Y   | N   | N  | N  | N  | N    | N  | N  | N  | Y  |
| 107 | Orlandi S. et al. [107]           | 2011 | Y    | N    | Y   | N   | N   | N   | Y   | Y   | N   | Y   | N  | N  | Y  | Y    | Y  | Y  | Y  | Y  |
| 108 | Orlandi S. et al. [108]           | 2012 | Y    | Y    | Y   | N   | N   | N   | Y   | Y   | N   | Y   | N  | N  | N  | Y    | Y  | Y  | Y  | Y  |
| 109 | Orlandi S. et al. [109]           | 2016 | Y    | Y    | Y   | Y   | Y   | N   | Y   | Y   | Y   | Y   | Y  | N  | Y  | Y    | N  | N  | N  | Y  |
| 110 | Orozco J. et al. [110]            | 2003 | Y    | Y    | Y   | N   | N   | N   | Y   | Y   | N   | N   | Y  | N  | N  | N    | Y  | N  | N  | Y  |
| 111 | Orozco-García J. et al. [111]     | 2003 | Y    | Y    | Y   | N   | N   | N   | Y   | Y   | N   | N   | Y  | N  | N  | Y    | N  | N  | Y  | Y  |
| 112 | Ostwald P. et al. [112]           | 1968 | Y    | Y    | Y   | Y   | Y   | Y   | Y   | Y   | Y   | Y   | N  | Y  | N  | Y    | Y  | Y  | Y  | Y  |
| 113 | Ostwald P. et al. [113]           | 1970 | Y    | Y    | Y   | Y   | Y   | N   | Y   | Y   | Y   | Y   | N  | Y  | N  | Y    | Y  | Y  | N  | Y  |
| 114 | Pal P. et al. [114]               | 2006 | N    | N    | N   | N   | N   | N   | Y   | N   | N   | N   | N  | N  | N  | N    | N  | N  | N  | N  |
| 115 | Patil H. A. et al. [115]          | 2010 | Y    | Y    | Y   | N   | Y   | N   | Y   | Y   | Y   | Y   | Y  | Y  | Y  | N    | Y  | Y  | N  | Y  |
| 116 | Perez A. M. et al. [116]          | 1997 | Y    | Y    | Y   | N   | Y   | N   | Y   | Y   | Y   | Y   | Y  | Y  | Y  | N    | N  | N  | N  | Y  |
| 117 | Petroni M. et al. [117]           | 1995 | Y    | Y    | Y   | N   | Y   | N   | Y   | Y   | Y   | Y   | Y  | Y  | Y  | N    | N  | N  | N  | Y  |
| 118 | Petrovich Bartell N. et al. [118] | 1982 | Y    | N    | Y   | Y   | Y   | Y   | Y   | Y   | Y   | Y   | Y  | Y  | N  | Y    | Y  | N  | Y  | Y  |
| 119 | Porter F. L. et al. [119]         | 1988 | Y    | N    | Y   | N   | N   | Y   | Y   | Y   | Y   | Y   | N  | N  | N  | Y    | Y  | N  | N  | Y  |
| 120 | Quick Z. L. et al. [120]          | 2009 | Y    | Y    | N   | Y   | Y   | Y   | Y   | Y   | Y   | N   | N  | Y  | N  | Y    | Y  | Y  | N  | Y  |
| 121 | Raes J. et al. [121]              | 1990 | Y    | Y    | Y   | N   | Y   | N   | Y   | N   | N   | N   | Y  | Y  | N  | Y    | Y  | Y  | N  | Y  |
| 122 | Rapisardi G. et al. [122]         | 1989 | Y    | Y    | Y   | N   | Y   | Y   | Y   | Y   | Y   | N   | Y  | Y  | Y  | N    | Y  | Y  | Y  | Y  |
| 123 | Rautava L. et al. [123]           | 2007 | Y    | N    | Y   | Y   | Y   | N   | Y   | Y   | Y   | Y   | Y  | N  | Y  | Y    | Y  | N  | N  | Y  |
| 124 | Reggianini B. et al. [124]        | 2013 | Y    | Y    | Y   | N   | Y   | Y   | Y   | Y   | Y   | Y   | Y  | Y  | N  | Y    | Y  | Y  | Y  | Y  |
| 125 | Reyes Galaviz O. F. et al. [125]  | 2005 | N    | Y    | N   | N   | N   | N   | Y   | Y   | N   | N   | N  | N  | Y  | Y    | Y  | N  | N  | N  |
| 126 | Reyes Galaviz O. F. et al. [126]  | 2005 | N    | Y    | Y   | N   | N   | N   | Y   | Y   | N   | N   | N  | N  | Y  | Y    | Y  | N  | Y  | Y  |
| 127 | Reyes Galaviz O. F. et al. [127]  | 2004 | Y    | Y    | Y   | N   | N   | N   | Y   | Y   | N   | N   | Y  | N  | Y  | Y    | Y  | N  | N  | Y  |
| 128 | Reyes Galaviz O. F. et al. [128]  | 2008 | N    | Y    | N   | N   | N   | N   | Y   | N   | N   | N   | N  | N  | N  | Y    | Y  | N  | Y  | N  |
| 129 | Reyes Galaviz O. F. et al. [129]  | 2008 | N    | Y    | N   | N   | N   | N   | Y   | N   | N   | N   | N  | N  | N  | Y    | Y  | N  | Y  | N  |
| 130 | Ringel R. L. et al. [130]         | 1964 | Y    | Y    | Y   | Y   | Y   | Y   | Y   | Y   | Y   | N   | N  | N  | N  | Y    | Y  | N  | N  | Y  |

Table 1 continued from previous page

|     | Authors                          | Year | Part | Samp | Age | Sex | Tri | Pos | Hea | Mic | MTM | Env | SR | FF | PP | SfHw | FE | FR | Ww | AF |
|-----|----------------------------------|------|------|------|-----|-----|-----|-----|-----|-----|-----|-----|----|----|----|------|----|----|----|----|
| 131 | Robb M. P. et al. [131]          | 1995 | Y    | Y    | N   | N   | Y   | N   | Y   | Y   | Y   | Y   | Y  | Y  | Y  | Y    | Y  | Y  | N  | Y  |
| 132 | Robb M. P. et al. [132]          | 1997 | Y    | Y    | Y   | Y   | Y   | N   | Y   | Y   | Y   | Y   | Y  | Y  | Y  | Y    | Y  | N  | N  | Y  |
| 133 | Robb M. P. et al. [133]          | 1997 | Y    | N    | N   | Y   | Y   | N   | Y   | N   | N   | N   | N  | N  | N  | Y    | N  | N  | N  | Y  |
| 134 | Robb M. P. et al. [134]          | 2003 | Y    | Y    | Y   | N   | Y   | Y   | Y   | Y   | Y   | N   | Y  | Y  | N  | Y    | Y  | N  | N  | Y  |
| 135 | Robb M. P. et al. [135]          | 2007 | Y    | Y    | Y   | N   | Y   | Y   | Y   | Y   | Y   | Y   | Y  | Y  | N  | Y    | Y  | N  | N  | Y  |
| 136 | Robb M. P. et al. [136]          | 2007 | Y    | Y    | Y   | N   | Y   | Y   | Y   | Y   | Y   | Y   | Y  | Y  | N  | Y    | Y  | N  | N  | Y  |
| 137 | Robb M. P. et al. [137]          | 2011 | Y    | N    | Y   | N   | Y   | Y   | Y   | Y   | Y   | N   | N  | N  | N  | Y    | Y  | N  | N  | Y  |
| 138 | Robb Q. et al. [138]             | 2013 | Y    | Y    | Y   | Y   | Y   | N   | Y   | Y   | Y   | Y   | Y  | N  | Y  | Y    | N  | N  | Y  | Y  |
| 139 | Rosales-Pérez A. et al. [139]    | 2015 | N    | Y    | N   | N   | Y   | N   | Y   | N   | N   | N   | N  | N  | Y  | Y    | Y  | N  | Y  | N  |
| 140 | Rothenberg S. J. et al. [140]    | 1995 | Y    | Y    | Y   | N   | Y   | Y   | Y   | Y   | Y   | N   | Y  | N  | Y  | Y    | Y  | N  | Y  | Y  |
| 141 | Rothganger H. Et al. [141]       | 2003 | Y    | N    | Y   | N   | Y   | N   | Y   | Y   | N   | Y   | N  | Y  | N  | Y    | N  | N  | N  | Y  |
| 142 | Sahin M. et al. [142]            | 2017 | Y    | Y    | Y   | Y   | Y   | Y   | Y   | Y   | Y   | Y   | Y  | N  | Y  | Y    | N  | N  | N  | Y  |
| 143 | Santiago-Sánchez K. et al. [143] | 2009 | N    | Y    | N   | N   | N   | N   | Y   | N   | N   | Y   | N  | N  | Y  | Y    | Y  | N  | Y  | Y  |
| 144 | Santos J. F. et al. [144]        | 2013 | Y    | Y    | Y   | N   | N   | N   | Y   | N   | N   | N   | Y  | N  | Y  | Y    | N  | N  | Y  | Y  |
| 145 | Saraswathy J. et al. [145]       | 2012 | Y    | Y    | N   | N   | N   | N   | Y   | N   | N   | N   | Y  | N  | Y  | Y    | Y  | N  | N  | Y  |
| 146 | Saraswathy J. et al. [146]       | 2013 | Y    | N    | N   | N   | N   | N   | Y   | N   | N   | N   | Y  | N  | N  | Y    | Y  | N  | Y  | N  |
| 147 | Scheiner E. et al. [147]         | 2002 | Y    | Y    | Y   | Y   | N   | N   | Y   | Y   | N   | Y   | Y  | N  | N  | Y    | Y  | N  | Y  | Y  |
| 148 | Scheiner E. et al. [148]         | 2004 | Y    | Y    | Y   | Y   | Y   | N   | Y   | Y   | N   | Y   | Y  | N  | N  | Y    | Y  | Y  | Y  | Y  |
| 149 | Schönweiler R. et al. [149]      | 1996 | Y    | Y    | N   | N   | Y   | N   | Y   | N   | N   | N   | N  | N  | N  | Y    | Y  | N  | N  | Y  |
| 150 | Senese V. P. et al. [150]        | 2017 | Y    | N    | Y   | Y   | N   | N   | Y   | N   | N   | Y   | Y  | N  | Y  | Y    | N  | N  | N  | Y  |
| 151 | Sheinkopf S. J. et al. [151]     | 2012 | Y    | N    | Y   | Y   | N   | N   | Y   | N   | N   | Y   | Y  | N  | Y  | Y    | Y  | N  | N  | Y  |
| 152 | Sheinkopf S. J. et al. [152]     | 2016 | Y    | N    | N   | Y   | Y   | Y   | Y   | Y   | N   | Y   | Y  | N  | N  | Y    | Y  | N  | N  | Y  |
| 153 | Shinya Y. et al. [153]           | 2014 | Y    | Y    | N   | N   | Y   | N   | Y   | Y   | N   | Y   | Y  | N  | Y  | Y    | Y  | N  | N  | Y  |
| 154 | Silva M. et al. [154]            | 2010 | Y    | Y    | Y   | Y   | Y   | N   | Y   | N   | Y   | Y   | Y  | N  | Y  | Y    | Y  | N  | N  | Y  |
| 155 | Singh A. K. et al. [155]         | 2013 | Y    | Y    | Y   | N   | Y   | N   | Y   | N   | N   | N   | Y  | N  | Y  | Y    | Y  | N  | N  | Y  |
| 156 | Sisto R. et al. [156]            | 2006 | Y    | N    | Y   | N   | Y   | N   | Y   | Y   | N   | N   | Y  | N  | Y  | Y    | Y  | N  | N  | Y  |
| 157 | St James-Roberts I. et al. [157] | 1999 | Y    | Y    | Y   | N   | Y   | N   | Y   | Y   | N   | N   | Y  | N  | Y  | Y    | Y  | Y  | Y  | Y  |
| 158 | Stevens B. J. et al. [158]       | 1994 | Y    | N    | N   | N   | Y   | N   | Y   | Y   | N   | Y   | N  | N  | Y  | Y    | Y  | N  | N  | Y  |
| 159 | Stewart A. M. et al. [159]       | 2013 | Y    | N    | Y   | N   | Y   | Y   | Y   | N   | N   | N   | N  | Y  | Y  | Y    | Y  | N  | N  | Y  |
| 160 | Tanja Etz a et al. [160]         | 2014 | Y    | Y    | N   | Y   | Y   | Y   | Y   | Y   | Y   | N   | Y  | N  | Y  | Y    | Y  | N  | N  | Y  |
| 161 | Tejaswini S. et al. [161]        | 2017 | Y    | Y    | Y   | N   | Y   | N   | Y   | Y   | N   | Y   | Y  | N  | Y  | Y    | Y  | N  | N  | Y  |
| 162 | Unwin L. M. et al. [162]         | 2017 | Y    | Y    | Y   | Y   | Y   | N   | Y   | Y   | N   | N   | Y  | Y  | Y  | Y    | Y  | N  | N  | Y  |
| 163 | Várallyay G. et al. [163]        | 2004 | Y    | Y    | Y   | N   | Y   | Y   | Y   | Y   | Y   | Y   | Y  | Y  | N  | Y    | Y  | N  | Y  | Y  |
| 164 | Várallyay G. Jr. et al. [164]    | 2005 | Y    | N    | Y   | Y   | Y   | Y   | Y   | N   | Y   | Y   | Y  | N  | Y  | Y    | Y  | N  | N  | Y  |
| 165 | Várallyay Jr. G. et al. [165]    | 2005 | Y    | N    | Y   | Y   | N   | Y   | Y   | Y   | Y   | Y   | Y  | Y  | N  | Y    | Y  | N  | N  | Y  |
| 166 | Várallyay Jr. G. et al. [166]    | 2006 | Y    | Y    | Y   | Y   | Y   | Y   | Y   | Y   | Y   | Y   | Y  | Y  | Y  | Y    | Y  | N  | N  | Y  |
| 167 | Várallyay Jr. G. et al. [167]    | 2007 | Y    | Y    | Y   | Y   | Y   | Y   | Y   | Y   | Y   | Y   | Y  | Y  | Y  | Y    | Y  | N  | Y  | Y  |
| 168 | Venuti P. et al. [168]           | 2012 | Y    | Y    | Y   | Y   | N   | N   | Y   | N   | N   | Y   | N  | N  | Y  | Y    | Y  | N  | N  | Y  |
| 169 | Volhr B. R. et al. [169]         | 1989 | Y    | Y    | N   | N   | Y   | N   | Y   | Y   | Y   | N   | Y  | N  | Y  | Y    | Y  | N  | Y  | Y  |
| 170 | Wahid N. S. A. et al. [170]      | 2016 | N    | Y    | Y   | N   | Y   | N   | Y   | N   | N   | N   | Y  | N  | Y  | Y    | Y  | N  | N  | Y  |
| 171 | Wermke K. et al. [171]           | 2002 | Y    | Y    | Y   | Y   | N   | N   | Y   | Y   | Y   | N   | N  | N  | Y  | Y    | Y  | N  | N  | Y  |
| 172 | Wermke K. et al. [172]           | 2002 | Y    | Y    | Y   | Y   | Y   | N   | Y   | Y   | Y   | N   | N  | N  | Y  | Y    | Y  | N  | N  | Y  |
| 173 | Wermke K. et al. [173]           | 2010 | Y    | Y    | Y   | Y   | Y   | N   | Y   | Y   | Y   | Y   | Y  | N  | Y  | Y    | Y  | N  | N  | Y  |

**Table 1 continued from previous page**

|     | Authors                    | Year | Part | Samp | Age | Sex | Tri | Pos | Hea | Mic | MTM | Env | SR | FF | PP | SfHW | FE | FR | Ww | AF |
|-----|----------------------------|------|------|------|-----|-----|-----|-----|-----|-----|-----|-----|----|----|----|------|----|----|----|----|
| 174 | Wermke K. et al. [174]     | 2016 | Y    | Y    | Y   | Y   | Y   | Y   | Y   | Y   | Y   | Y   | N  | Y  | Y  | Y    | Y  | N  | N  | Y  |
| 175 | Wermke K. et al. [175]     | 2017 | Y    | Y    | Y   | N   | Y   | N   | Y   | N   | N   | N   | N  | N  | Y  | Y    | Y  | N  | N  | Y  |
| 176 | Xie Q. et al. [176]        | 1996 | Y    | N    | Y   | N   | Y   | N   | Y   | N   | Y   | Y   | Y  | N  | Y  | Y    | Y  | N  | N  | N  |
| 177 | Zeskind P. S. et al. [177] | 1978 | Y    | Y    | Y   | N   | Y   | Y   | Y   | Y   | Y   | Y   | N  | Y  | N  | Y    | Y  | Y  | N  | Y  |
| 178 | Zeskind P. S. et al. [178] | 1997 | Y    | N    | Y   | Y   | Y   | Y   | Y   | N   | N   | N   | Y  | Y  | Y  | Y    | Y  | N  | Y  | Y  |
| 179 | Zeskind P. S. et al. [179] | 2011 | N    | N    | N   | N   | Y   | N   | Y   | Y   | Y   | Y   | Y  | N  | Y  | Y    | Y  | N  | Y  | Y  |
| 180 | Zeskind P. S. et al. [180] | 2014 | Y    | N    | Y   | Y   | Y   | N   | Y   | Y   | Y   | N   | Y  | N  | N  | Y    | Y  | N  | N  | Y  |

Table 1: Summary of reported information per article.

## References

## References

- [1] Lina Abou-Abbas, Hesam Fersaie Alaie, and Chakib Tadj. Automatic detection of the expiratory and inspiratory phases in newborn cry signals. *Biomedical signal processing and control*, 19:35–43, 2015.
- [2] Lina Abou-Abbas, Leila Montazeri, Christian Gargour, and Chakib Tadj. On the use of emd for automatic newborn cry segmentation. In *2015 International Conference on Advances in Biomedical Engineering (ICABME)*, pages 262–265. IEEE, 2015.
- [3] Lina Abou-Abbas, Chakib Tadj, Christian Gargour, and Leila Montazeri. Expiratory and inspiratory cries detection using different signals’ decomposition techniques. *Journal of voice*, 31(2):259–e13, 2017.
- [4] Hesam Farsaie Alaie, Lina Abou-Abbas, and Chakib Tadj. Cry-based infant pathology classification using gmms. *Speech communication*, 77:28–52, 2016.
- [5] Erika Amaro-Camargo and Carlos A Reyes-García. Applying statistical vectors of acoustic characteristics for the automatic classification of infant cry. In *International Conference on Intelligent Computing*, pages 1078–1085. Springer, 2007.
- [6] Ji-Hye Bae, Ik-Soo Ahn, and Myung-Jin Bae. Study on cow cry sound that causes a baby to cry. *International Information Institute (Tokyo). Information*, 20(6A):4079–4084, 2017.
- [7] HE Baeck and MN Souza. Study of acoustic features of newborn cries that correlate with the context. In *2001 Conference Proceedings of the 23rd Annual International Conference of the IEEE Engineering in Medicine and Biology Society*, volume 3, pages 2174–2177. IEEE, 2001.
- [8] HE Baeck and MN Souza. A bayesian classifier for baby’s cry in pain and non-pain contexts. In *Proceedings of the 25th Annual International Conference of the IEEE Engineering in Medicine and Biology Society (IEEE Cat. No. 03CH37439)*, volume 3, pages 2944–2946. IEEE, 2003.
- [9] Heidi Elisabeth Baeck and Marcio Nogueira de Souza. Longitudinal study of the fundamental frequency of hunger cries along the first 6 months of healthy babies. *Journal of Voice*, 21(5):551–559, 2007.
- [10] Abhishek Basak, Seetharam Narasimhan, and Swarup Bhunia. Kims: Kids’ health monitoring system at day-care centers using wearable sensors and vocabulary-based acoustic signal processing. In *2011 IEEE 13th International Conference on e-Health Networking, Applications and Services*, pages 1–8. IEEE, 2011.
- [11] Rudolf Bisping, Hans Joachim Steingrueber, Martine Oltmann, and Christine Wenk. Adults’ tolerance of cries: An experimental investigation of acoustic features. *Child Development*, 61(4):1218–1229, 1990.
- [12] Anja Borysiak, Volker Hesse, Peter Wermke, Johannes Hain, Michael Robb, and Kathleen Wermke. Fundamental frequency of crying in two-month-old boys and girls: do sex hormones during mini-puberty mediate differences? *Journal of Voice*, 31(1):128–e21, 2017.
- [13] CF Zachariah Boukydis and Barry M Lester. Infant crying, risk status and social support in families of preterm and term infants. *Early Development and Parenting: An International Journal of Research and Practice*, 7(1):31–39, 1998.
- [14] Anete Branco, Mara Behlau, and Maria Inês Rehder. The neonate cry after cesarean section and vaginal delivery during the first minutes of life. *International journal of pediatric otorhinolaryngology*, 69(5):681–689, 2005.
- [15] Anete Branco, Saskia MW Fekete, Ligia MSS Rugolo, and Maria Inês Rehder. The newborn pain cry: Descriptive acoustic spectrographic analysis. *International journal of pediatric otorhinolaryngology*, 71(4):539–546, 2007.
- [16] Anthony T Cacace, Michael P Robb, John H Saxman, Herman Risemberg, and Peter Koltai. Acoustic features of normal-hearing pre-term infant cry. *International journal of pediatric otorhinolaryngology*, 33(3):213–224, 1995.
- [17] Sergio Cano, Israel Suaste, Daniel Escobedo, Carlos A Reyes-García, and Taco Ekkel. A combined classifier of cry units with new acoustic attributes. In *Iberoamerican Congress on Pattern Recognition*, pages 416–425. Springer, 2006.
- [18] Sergio D Cano Ortiz, Daniel I Escobedo Beceiro, and Taco Ekkel. A radial basis function network oriented for infant cry classification. In *Iberoamerican Congress on Pattern Recognition*, pages 374–380. Springer, 2004.
- [19] Marco Cecchini, Carlo Lai, and Viviana Langher. Dysphonic newborn cries allow prediction of their perceived meaning. *Infant Behavior and Development*, 33(3):314–320, 2010.

- [20] Anshu Chittora and Hamant A Patil. Data collection and corpus design for analysis of nonnal and pathological infant cry. In *2013 International Conference Oriental COCOSDA held jointly with 2013 Conference on Asian Spoken Language Research and Evaluation (O-COCOSDA/CASLRE)*, pages 1–6. IEEE, 2013.
- [21] Anshu Chittora and Hemant A Patil. Use of glottal inverse filtering for asthma and hie infant cries classification. In *2014 International Conference on Asian Language Processing (IALP)*, pages 158–161. IEEE, 2014.
- [22] Anshu Chittora and Hemant A Patil. Newborn infant’s cry analysis. *International Journal of Speech Technology*, 19(4):919–928, 2016.
- [23] Anshu Chittora and Hemant A Patil. Data collection of infant cries for research and analysis. *Journal of Voice*, 31(2):252–e15, 2017.
- [24] Anne-Sophie Cismaresco and Hubert Montagner. Mothers’ discrimination of their neonates’ cry in relation to cry acoustics: The first week of life. *Early Child Development and Care*, 65(1):3–11, 1990.
- [25] RH Colton and A Steinschneider. The cry characteristics of an infant who died of the sudden infant death syndrome. *Journal of Speech and Hearing Disorders*, 46(4):359–363, 1981.
- [26] Michael J Corwin, Herbert Kayne, Barry M Lester, Carol Sepkoski, Sarah McLaughlin, and Howard L Golub. Effects of in utero cocaine exposure on newborn acoustical cry characteristics. *Pediatrics*, 89(6):1199–1203, 1992.
- [27] Nicola De Pisapia, Marc H Bornstein, Paola Rigo, Gianluca Esposito, Simona De Falco, and Paola Venuti. Gender differences in directional brain responses to infant hunger cries. *Neuroreport*, 24(3):142, 2013.
- [28] Gianluca Esposito and Paola Venuti. Developmental changes in the fundamental frequency (f0) of infants’ cries: A study of children with autism spectrum disorder. *Early Child Development and Care*, 180(8):1093–1102, 2010.
- [29] G Esposito and P Venuti. Understanding early communication signals in autism: a study of the perception of infants’ cry. *Journal of Intellectual Disability Research*, 54(3):216–223, 2010.
- [30] Gianluca Esposito, Jun Nakazawa, Paola Venuti, and Marc H Bornstein. Componential deconstruction of infant distress vocalizations via tree-based models: A study of cry in autism spectrum disorder and typical development. *Research in Developmental Disabilities*, 34(9):2717–2724, 2013.
- [31] Gianluca Esposito, Maria del Carmen Rostagno, Paola Venuti, John D Haltigan, and Daniel S Messinger. Brief report: Atypical expression of distress during the separation phase of the strange situation procedure in infant siblings at high risk for asd. *Journal of Autism and Developmental Disorders*, 44(4):975–980, 2014.
- [32] Gianluca Esposito, Stefano Valenzi, Tanvir Islam, and Marc H Bornstein. Three physiological responses in fathers and non-fathers’ to vocalizations of typically developing infants and infants with autism spectrum disorder. *Research in developmental disabilities*, 43:43–50, 2015.
- [33] Gianluca Esposito, Nanmathi Manian, Anna Truzzi, and Marc H Bornstein. Response to infant cry in clinically depressed and non-depressed mothers. *PloS one*, 12(1):e0169066, 2017.
- [34] Tanja Etz, Henning Reetz, and Carla Wegener. A classification model for infant cries with hearing impairment and unilateral cleft lip and palate. *Folia Phoniatica et Logopaedica*, 64(5):254–261, 2012.
- [35] Ada Fort and Claudia Manfredi. Acoustic analysis of newborn infant cry signals. *Medical engineering & physics*, 20(6):432–442, 1998.
- [36] Ndemazeh Arnold Fuamenya, Michael P Robb, and Kathleen Wermke. Noisy but effective: Crying across the first 3 months of life. *Journal of Voice*, 29(3):281–286, 2015.
- [37] Barbara F Fuller and Yoshiyuki Horii. Spectral energy distribution in four types of infant vocalizations. *Journal of communication disorders*, 21(3):251–261, 1988.
- [38] Barbara F Fuller. Acoustic discrimination of three types of infant cries. *Nursing Research*, 1991.
- [39] Barbara F Fuller, Maureen R Keefe, Mary Curtin, and Bonnie J Garvin. Acoustic analysis of cries from” normal” and” irritable” infants. *Western journal of nursing research*, 16(3):243–253, 1994.
- [40] Barbara F Fuller and Douglas A Conner. The effect of pain on infant behaviors. *Clinical Nursing Research*, 4(3):253–273, 1995.

- [41] Orion Fausto Reyes Galaviz and Carlos Alberto Reyes Garcia. Infant cry classification to identify hypoacoustics and asphyxia with neural networks. In *Mexican International Conference on Artificial Intelligence*, pages 69–78. Springer, 2004.
- [42] Jose Orozco Garcia and CA Reyes Garcia. Mel-frequency cepstrum coefficients extraction from infant cry for classification of normal and pathological cry with feed-forward neural networks. In *Proceedings of the International Joint Conference on Neural Networks, 2003.*, volume 4, pages 3140–3145. IEEE, 2003.
- [43] Sanford E Gerber. Acoustical analyses of neonates’ vocalizations. *International journal of pediatric otorhinolaryngology*, 10(1):1–8, 1985.
- [44] Sanford E Gerber, Constance J Lynch, and William S Gibson Jr. The acoustic characteristics of the cry of an infant with unilateral vocal fold paralysis. *International journal of pediatric otorhinolaryngology*, 13(1):1–9, 1987.
- [45] Harvey R Gilbert and Michael P Robb. Vocal fundamental frequency characteristics of infant hunger cries: birth to 12 months. *International journal of pediatric otorhinolaryngology*, 34(3):237–243, 1996.
- [46] Alexander M Goberman and Michael P Robb. Acoustic examination of preterm and full-term infant cries: The long-time average spectrum. *Journal of Speech, Language, and Hearing Research*, 42(4):850–861, 1999.
- [47] Alexander M Goberman and Michael P Robb. Acoustic characteristics of crying in infantile laryngomalacia. *Logopedics Phoniatrics Vocology*, 30(2):79–84, 2005.
- [48] Alexander M Goberman, Susan Johnson, Michael S Cannizzaro, and Michael P Robb. The effect of positioning on infant cries: Implications for sudden infant death syndrome. *International journal of pediatric otorhinolaryngology*, 72(2):153–165, 2008.
- [49] Howard L Golub and Michael J Corwin. Infant cry: a clue to diagnosis. *Pediatrics*, 69(2):197–201, 1982.
- [50] Susan M Grau, Michael P Robb, and Anthony T Cacace. Acoustic correlates of inspiratory phonation during infant cry. *Journal of Speech, Language, and Hearing Research*, 38(2):373–381, 1995.
- [51] James A Green and Gwen E Gustafson. Interrelations among the acoustic features of cries: How many features do we need? *Early Child Development and Care*, 65(1):31–44, 1990.
- [52] James A Green, Gwen E Gustafson, and Anne C McGhie. Changes in infants’ cries as a function of time in a cry bout. *Child development*, 69(2):271–279, 1998.
- [53] Ruth VE Grunau, C Celeste Johnston, and Kenneth D Craig. Neonatal facial and cry responses to invasive and non-invasive procedures. *Pain*, 42(3):295–305, 1990.
- [54] Gwene E Gustafson, James A Green, and Tamara Tomic. Acoustic correlates of individuality in the cries of human infants. *Developmental Psychobiology: The Journal of the International Society for Developmental Psychobiology*, 17(3):311–324, 1984.
- [55] Gwen E Gustafson and James A Green. On the importance of fundamental frequency and other acoustic features in cry perception and infant development. *Child development*, pages 772–780, 1989.
- [56] Gwen E Gustafson, Sarah M Sanborn, Hung-Chu Lin, and James A Green. Newborns’ cries are unique to individuals (but not to language environment). *Infancy*, 22(6):736–747, 2017.
- [57] M Hariharan, Sazali Yaacob, and Saidatul Ardeenaawatie Awang. Pathological infant cry analysis using wavelet packet transform and probabilistic neural network. *Expert Systems with Applications*, 38(12):15377–15382, 2011.
- [58] M Hariharan, Lim Sin Chee, and Sazali Yaacob. Analysis of infant cry through weighted linear prediction cepstral coefficients and probabilistic neural network. *Journal of medical systems*, 36(3):1309–1315, 2012.
- [59] M Hariharan, J Saraswathy, R Sindhu, Wan Khairunizam, and Sazali Yaacob. Infant cry classification to identify asphyxia using time-frequency analysis and radial basis neural networks. *Expert Systems with Applications*, 39(10):9515–9523, 2012.
- [60] Muthusamy Hariharan, R Sindhu, and Sazali Yaacob. Normal and hypoacoustic infant cry signal classification using time–frequency analysis and general regression neural network. *Computer methods and programs in biomedicine*, 108(2):559–569, 2012.
- [61] Rahmat Hidayati, I Ketut Eddy Purnama, and Mauridhi Hery Purnomo. The extraction of acoustic features of infant cry for emotion detection based on pitch and formants. In *International Conference on Instrumentation, Communication, Information Technology, and Biomedical Engineering 2009*, pages 1–5. IEEE, 2009.



- [62] Jenö Hirschberg. Acoustic analysis of pathological cries, stridor and coughing sounds in infancy. *International journal of pediatric otorhinolaryngology*, 2(4):287–300, 1980.
- [63] Jenö Hirschberg. The value of the acoustic analysis of pathological infant cry and breathing noise in everyday practice. *Early child development and care*, 65(1):57–69, 1990.
- [64] Kazuki Honda, Kazuki Kitahara, Shoichi Matsunaga, Masaru Yamashita, and Kazuyuki Shinohara. Emotion classification of infant cries with consideration for local and global features. In *Proceedings of The 2012 Asia Pacific Signal and Information Processing Association Annual Summit and Conference*, pages 1–4. IEEE, 2012.
- [65] Lynne C Huffman, Yvonne E Bryan, Frank A Pedersen, Barry M Lester, John D Newman, and Rebecca del Carmen. Infant cry acoustics and maternal ratings of temperament. *Infant Behavior and Development*, 17(1):45–53, 1994.
- [66] C Celeste Johnston, Adam Sherrard, Bonnie Stevens, Linda Franck, Robyn Stremler, and Anne Jack. Do cry features reflect pain intensity in preterm neonates? *Neonatology*, 76(2):120–124, 1999.
- [67] M Carolyn Jones. Diagnostic implications of acoustic cry features. *Journal of Communication Disorders*, 4(4):310–316, 1971.
- [68] Chan Uhng Joo, Yoon Mi Choi, and Sun Jun Kim. Acoustic improvements after surgical correction in congenital heart disease. *Pediatrics International*, 57(2):205–209, 2015.
- [69] Taylor Kelly, David Reby, Florence Levréro, Sumir Keenan, Erik Gustafsson, Alexis Koutseff, and Nicolas Mathevon. Adult human perception of distress in the cries of bonobo, chimpanzee, and human infants. *Biological Journal of the Linnean Society*, 120(4):919–930, 2017.
- [70] Yasmina Kheddache and Chakib Tadj. Newborn’s pathological cry identification system. In *2012 11th International Conference on Information Science, Signal Processing and their Applications (ISSPA)*, pages 1024–1029. IEEE, 2012.
- [71] Yasmina Kheddache and Chakib Tadj. Resonance frequencies behavior in pathologic cries of newborns. *Journal of Voice*, 29(1):1–12, 2015.
- [72] Kazuki Kitahara, Shinzi Michiwiki, Miku Sato, Shoichi Matsunaga, Masaru Yamashita, and Kazuyuki Shinohara. Emotion classification of infants’ cries using duration ratios of acoustic segments. In *Twelfth Annual Conference of the International Speech Communication Association*, 2011.
- [73] Alexis Koutseff, David Reby, Olivier Martin, Florence Levrero, Hugues Patural, and Nicolas Mathevon. The acoustic space of pain: cries as indicators of distress recovering dynamics in pre-verbal infants. *Bioacoustics*, 27(4):313–325, 2018.
- [74] Daniel W Leger, Ross A Thompson, Jacquelyn A Merritt, and Joseph J Benz. Adult perception of emotion intensity in human infant cries: Effects of infant age and cry acoustics. *Child Development*, 67(6):3238–3249, 1996.
- [75] D Lenti Boero, C Bianchi, C Volpe, A Marcello, and C Lenti. Newborns crying in different contexts: discrete or graded signals? *Perceptual and Motor Skills*, 86(3-suppl):1123–1140, 1998.
- [76] Daniela Lenti Boero, Giovanna Weber, Maria Cristina Vigone, and Carlo Lenti. Crying abnormalities in congenital hypothyroidism: preliminary spectrographic study. *Journal of child neurology*, 15(9):603–608, 2000.
- [77] Barry M Lester. Spectrum analysis of the cry sounds of well-nourished and malnourished infants. *Child Development*, pages 237–241, 1976.
- [78] Barry M Lester. A synergistic process approach to the study of prenatal malnutrition. *International Journal of Behavioral Development*, 2(4):377–393, 1979.
- [79] Barry M Lester. Developmental outcome prediction from acoustic cry analysis in term and preterm infants. *Pediatrics*, 80(4):529–534, 1987.
- [80] Barry M Lester, Cynthia T Garcia-Coll, and Marta Valcarcel. Perception of infant cries in adolescent and adult mothers. *Journal of youth and adolescence*, 18(3):231–243, 1988.
- [81] BM Lester, LT Anderson, CF Boukydis, CT Garcia-Coll, B Vohr, and M Peucker. Early detection of infants at risk for later handicap through acoustic cry analysis. *Birth defects original article series*, 25(6):99–118, 1989.
- [82] Barry M Lester and Melanie Dreher. Effects of marijuana use during pregnancy on newborn cry. *Child development*, pages 765–771, 1989.

- [83] Barry M Lester, CF Zachariah Boukydis, Cynthia T Garcia-Coll, William Hole, and Mark Peucker. Infantile colic: Acoustic cry characteristics, maternal perception of cry, and temperament. *Infant Behavior and Development*, 15(1):15–26, 1992.
- [84] Barry M Lester, CF Zachariah Boukydis, Cynthia T Garcia-Coll, Mark Peucker, Margaret M McGrath, Betty R Vohr, Francine Brem, and William Oh. Developmental outcome as a function of the goodness of fit between the infant’s cry characteristics and the mother’s perception of her infant’s cry. *Pediatrics*, 95(4):516–521, 1995.
- [85] Barry M Lester, Edward Z Tronick, Linda LaGasse, Ronald Seifer, Charles R Bauer, Seetha Shankaran, Henrietta S Bada, Linda L Wright, Vincent L Smeriglio, Jing Lu, et al. The maternal lifestyle study: effects of substance exposure during pregnancy on neurodevelopmental outcome in 1-month-old infants. *Pediatrics*, 110(6):1182–1192, 2002.
- [86] Hung-Chu Lin and James A Green. Effects of posture on newborn crying. *Infancy*, 11(2):175–189, 2007.
- [87] Katrin Lind and Kathleen Wermke. Development of the vocal fundamental frequency of spontaneous cries during the first 3 months. *International journal of pediatric otorhinolaryngology*, 64(2):97–104, 2002.
- [88] Mary L Lounsbury and John E Bates. The cries of infants of differing levels of perceived temperamental difficultness: Acoustic properties and effects on listeners. *Child Development*, pages 677–686, 1982.
- [89] Wolfgang Lüdge and Peter Gips. Microcomputer-aided studies of cry jitter uttered by newborn children based upon high-resolution analysis of fundamental frequencies. *Computer methods and programs in biomedicine*, 28(3):151–156, 1989.
- [90] Peter Lundh. A new baby-alarm based on tenseness of the cry signal. *Scandinavian audiology*, 15(4):191–196, 1986.
- [91] Zita Makóí, P Popper, and Kiss P Gegeski. Analysis of infant cry as an indicatory function. *Acta paediatrica Academiae Scientiarum Hungaricae*, 11(3):281, 1970.
- [92] C Manfredi, L Bocchi, S Orlandi, M Calisti, L Spaccaterra, and GP Donzelli. Non-invasive distress evaluation in preterm newborn infants. In *2008 30th Annual International Conference of the IEEE Engineering in Medicine and Biology Society*, pages 2908–2911. IEEE, 2008.
- [93] C Manfredi, L Bocchi, S Orlandi, L Spaccaterra, and GP Donzelli. High-resolution cry analysis in preterm newborn infants. *Medical engineering & physics*, 31(5):528–532, 2009.
- [94] William A Marasovich, HS Gopal, Sanford E Gerber, and William S Gibson Jr. Diplophonia in a neonate. *International journal of pediatric otorhinolaryngology*, 25(1-3):227–234, 1993.
- [95] Raymond M Massengill Jr. Cry characteristics in cleft-palate neonates. *The Journal of the Acoustical Society of America*, 45(3):782–784, 1969.
- [96] Shoichi Matsunaga, S Sakaguchi, Masaru Yamashita, Sueharu Miyahara, S Nishitani, and Kazuyuki Shinohara. Emotion detection in infants’ cries based on a maximum likelihood approach. In *Ninth International Conference on Spoken Language Processing*, 2006.
- [97] Ali Messaoud and Chakib Tadj. A cry-based babies identification system. In *International Conference on Image and Signal Processing*, pages 192–199. Springer, 2010.
- [98] Ali Messaoud and Chakib Tadj. Analysis of acoustic features of infant cry for classification purposes. In *2011 24th Canadian Conference on Electrical and Computer Engineering (CCECE)*, pages 000089–000092. IEEE, 2011.
- [99] K Michelsson and P Sirviö. Cry analysis in congenital hypothyroidism. *Folia phoniatrica et logopaedica*, 28(1):40–47, 1976.
- [100] K Michelsson, AL Järvenpää, and A Rinne. Sound spectrographic analysis of pain cry in preterm infants. *Early human development*, 8(2):141–149, 1983.
- [101] B Mijović, Mitchell Silva, Bergh Van den BRH, Karel Allegaert, Jean-Marie Aerts, Daniel Berckmans, and Van S Huffel. Assessment of pain expression in infant cry signals using empirical mode decomposition. *Methods of information in medicine*, 49(05):448–452, 2010.
- [102] Vinay Kumar Mittal. Discriminating features of infant cry acoustic signal for automated detection of cause of crying. In *2016 10th International Symposium on Chinese Spoken Language Processing (ISCSLP)*, pages 1–5. IEEE, 2016.
- [103] Thomas Murry, Pamela Amundson, and Harry Hollien. Acoustical characteristics of infant cries: Fundamental frequency. *Journal of child language*, 4(3):321–328, 1977.

- [104] Pruthvi Raj Myakala, Rajasree Nalumachu, and VK Mittal. A low cost intelligent smart system for real time child monitoring in the school. In *International Symposium on Signal Processing and Intelligent Recognition Systems*, pages 427–438. Springer, 2017.
- [105] Gaurav Naithani, Jaana Kivinummi, Tuomas Virtanen, Outi Tammela, Mikko J Peltola, and Jukka M Leppänen. Automatic segmentation of infant cry signals using hidden markov models. *EURASIP Journal on Audio, Speech, and Music Processing*, 2018(1):1, 2018.
- [106] J Kevin Nugent, Barry M Lester, Sheila M Greene, Dorith Wieczorek-Deering, and Paul O’Mahony. The effects of maternal alcohol consumption and cigarette smoking during pregnancy on acoustic cry analysis. *Child development*, 67(4):1806–1815, 1996.
- [107] Silvia Orlandi, Leonardo Bocchi, Claudia Manfredi, Maria Puopolo, Andrea Guzzetta, Stefano Vicari, and Maria Luisa Scattoni. Study of cry patterns in infants at high risk for autism. In *MAVEBA*, pages 7–10, 2011.
- [108] Silvia Orlandi, Claudia Manfredi, Leonardo Bocchi, and Maria Luisa Scattoni. Automatic newborn cry analysis: a non-invasive tool to help autism early diagnosis. In *2012 Annual International Conference of the IEEE Engineering in Medicine and Biology Society*, pages 2953–2956. IEEE, 2012.
- [109] Silvia Orlandi, Carlos Alberto Reyes Garcia, Andrea Bandini, Gianpaolo Donzelli, and Claudia Manfredi. Application of pattern recognition techniques to the classification of full-term and preterm infant cry. *Journal of Voice*, 30(6):656–663, 2016.
- [110] Jose Orozco and Carlos A Reyes-Garcia. Implementation and analysis of training algorithms for the classification of infant cry with feed-forward neural networks. In *IEEE International Symposium on Intelligent Signal Processing, 2003*, pages 271–276. IEEE, 2003.
- [111] José Orozco-García and Carlos A Reyes-García. A study on the recognition of patterns of infant cry for the identification of deafness in just born babies with neural networks. In *Iberoamerican Congress on Pattern Recognition*, pages 342–349. Springer, 2003.
- [112] Peter F Ostwald, R Phibbs, and S Fox. Diagnostic use of infant cry. *Biologia neonatorum. Neo-natal studies*, 13(1):68, 1968.
- [113] P Ostwald, P Peltzman, M Greenberg, and J Meyer. Cries of a trisomy 13–15 infant. *Developmental Medicine & Child Neurology*, 12(4):472–477, 1970.
- [114] Pritam Pal, Ananth N Iyer, and Robert E Yantorno. Emotion detection from infant facial expressions and cries. In *2006 IEEE International Conference on Acoustics Speech and Signal Processing Proceedings*, volume 2, pages II–II. IEEE, 2006.
- [115] Hemant A Patil. “cry baby”: Using spectrographic analysis to assess neonatal health status from an infant’s cry. In *Advances in speech recognition*, pages 323–348. Springer, 2010.
- [116] AM Perez, A Gutierrez, M Sanchez, J Remolina, O Aguilera, L Leija, and RP Hernández. Determination of a mathematical indicator from the acoustical analysis of primal crying of newborns to evaluate their well-being. In *Proceedings of the 19th Annual International Conference of the IEEE Engineering in Medicine and Biology Society. ‘Magnificent Milestones and Emerging Opportunities in Medical Engineering’ (Cat. No. 97CH36136)*, volume 3, pages 1073–1075. IEEE, 1997.
- [117] M Petroni, AS Malowany, CC Johnston, and BJ Stevens. On the use of artificial neural networks (anns) for the classification of three types of infant cries. In *IEEE Pacific Rim Conference on Communications, Computers, and Signal Processing. Proceedings*, pages 501–504. IEEE, 1995.
- [118] Nina Petrovich-Bartell, Nelson Cowan, and Philip A Morse. Mothers’ perceptions of infant distress vocalizations. *Journal of Speech, Language, and Hearing Research*, 25(3):371–376, 1982.
- [119] Fran Lang Porter, Stephen W Porges, and Richard E Marshall. Newborn pain cries and vagal tone: Parallel changes in response to circumcision. *Child development*, pages 495–505, 1988.
- [120] Zoe L Quick, Michael P Robb, and Lianne J Woodward. Acoustic cry characteristics of infants exposed to methadone during pregnancy. *Acta Paediatrica*, 98(1):74–79, 2009.
- [121] Jan Raes, Freddy Dehaen, and Marc Despontin. Towards a standardized terminology and methodology for the measurement of durational pain cry characteristics. *Early Child Development and Care*, 65(1):127–138, 1990.

- [122] Gherardo Rapisardi, Betty Vohr, William Cashore, Mark Peucker, and Barry Lester. Assessment of infant cry variability in high-risk infants. *International journal of pediatric otorhinolaryngology*, 17(1):19–29, 1989.
- [123] Liisi Rautava, Asta Lempinen, Stina Ojala, Riitta Parkkola, Hellevi Rikalainen, Helena Lapinleimu, Leena Haataja, Liisa Lehtonen, PIPARI Study Group, et al. Acoustic quality of cry in very-low-birth-weight infants at the age of 1 1/2 years. *Early Human Development*, 83(1):5–12, 2007.
- [124] Brian Reggiannini, Stephen J Sheinkopf, Harvey F Silverman, Xiaoxue Li, and Barry M Lester. A flexible analysis tool for the quantitative acoustic assessment of infant cry. *Journal of Speech, Language, and Hearing Research*, 2013.
- [125] Orion Fausto Reyes Galaviz and Carlos Alberto Reyes García. Infant cry classification to identify hypo acoustics and asphyxia comparing an evolutionary-neural system with a neural network system. In *Mexican International Conference on Artificial Intelligence*, pages 949–958. Springer, 2005.
- [126] Orion F Reyes-Galaviz, Antonio Verduzco, Emilio Arch-Tirado, and Carlos A Reyes-García. Analysis of an infant cry recognizer for the early identification of pathologies. In *International School on Neural Networks, Initiated by IIASS and EMFCSC*, pages 404–409. Springer, 2004.
- [127] Orion F Reyes-Galaviz, Emilio Arch Tirado, and Carlos Alberto Reyes-Garcia. Classification of infant crying to identify pathologies in recently born babies with anfis. In *International Conference on Computers for Handicapped Persons*, pages 408–415. Springer, 2004.
- [128] Orion Fausto Reyes-Galaviz, Sergio Daniel Cano-Ortiz, and Carlos Alberto Reyes-García. Evolutionary-neural system to classify infant cry units for pathologies identification in recently born babies. In *2008 Seventh Mexican International Conference on Artificial Intelligence*, pages 330–335. IEEE, 2008.
- [129] Orion Fausto Reyes-Galaviz, Sergio Daniel Cano-Ortiz, and Carlos Alberto Reyes-García. Validation of the cry unit as primary element for cry analysis using an evolutionary-neural approach. In *2008 Mexican International Conference on Computer Science*, pages 261–267. IEEE, 2008.
- [130] Robert L Ringel and Delores D Kluppel. Neonatal crying: A normative study. *Folia Phoniatri et Logopaedica*, 16(1):1–9, 1964.
- [131] Michael P Robb and Anthony T Cacace. Estimation of formant frequencies in infant cry. *International Journal of Pediatric Otorhinolaryngology*, 32(1):57–67, 1995.
- [132] Michael P Robb, Alexander M Goberman, and Anthony T Cacace. An acoustic template of newborn infant crying. *Folia phoniatri et logopaedica*, 49(1):35–41, 1997.
- [133] Michael P Robb and Alexander M Goberman. Application of an acoustic cry template to evaluate at-risk newborns: Preliminary findings. *Neonatology*, 71(2):131–136, 1997.
- [134] Michael P Robb. Bifurcations and chaos in the cries of full-term and preterm infants. *Folia phoniatri et logopaedica*, 55(5):233–240, 2003.
- [135] Michael P Robb, David H Crowell, and Peter Dunn-Rankin. Cry analysis in infants resuscitated for apnea of infancy. *International journal of pediatric otorhinolaryngology*, 71(7):1117–1123, 2007.
- [136] Michael P Robb, David H Crowell, Peter Dunn-Rankin, and Cynthia Tinsley. Cry features in siblings of sids. *Acta Paediatrica*, 96(10):1404–1408, 2007.
- [137] Michael P Robb, Heather Sinton-White, and Ramesh Kaipa. Acoustic estimates of respiration in the pain cries of newborns. *International journal of pediatric otorhinolaryngology*, 75(10):1265–1270, 2011.
- [138] Michael P Robb, David H Crowell, and Peter Dunn-Rankin. Sudden infant death syndrome: cry characteristics. *International journal of pediatric otorhinolaryngology*, 77(8):1263–1267, 2013.
- [139] Alejandro Rosales-Pérez, Carlos A Reyes-García, Jesus A Gonzalez, Orion F Reyes-Galaviz, Hugo Jair Escalante, and Silvia Orlandi. Classifying infant cry patterns by the genetic selection of a fuzzy model. *Biomedical Signal Processing and Control*, 17:38–46, 2015.
- [140] Stephen J Rothenberg, Selene Cansino, Carol Sepkoski, Leticia Mercado Torres, Sandra Medina, Lourdes Schnaas, Adrian Poblano, and Samuel Karchmer. Prenatal and perinatal lead exposures alter acoustic cry parameters of neonate. *Neurotoxicology and teratology*, 17(2):151–160, 1995.
- [141] Hartmut Rothgänger. Analysis of the sounds of the child in the first year of age and a comparison to the language. *Early Human Development*, 75(1-2):55–69, 2003.

- [142] Mustafa Sahin, Suzan Sahin, Fatma N Sari, Emel C Tatar, Nurdan Uras, Suna S Oguz, and Mehmet H Korkmaz. Utilizing infant cry acoustics to determine gestational age. *Journal of Voice*, 31(4):506–e1, 2017.
- [143] Karen Santiago-Sánchez, Carlos A Reyes-García, and Pilar Gómez-Gil. Type-2 fuzzy sets applied to pattern matching for the classification of cries of infants under neurological risk. In *International Conference on Intelligent Computing*, pages 201–210. Springer, 2009.
- [144] Joao F Santos, Nirit Brosh, Tiago H Falk, Lonnie Zwaigenbaum, Susan E Bryson, Wendy Roberts, Isabel M Smith, Peter Szatmari, and Jessica A Brian. Very early detection of autism spectrum disorders based on acoustic analysis of pre-verbal vocalizations of 18-month old toddlers. In *2013 IEEE International Conference on Acoustics, Speech and Signal Processing*, pages 7567–7571. IEEE, 2013.
- [145] J Saraswathy, M Hariharan, Vikneswaran Vijejan, Sazali Yaacob, and Wan Khairunizam. Performance comparison of daubechies wavelet family in infant cry classification. In *2012 IEEE 8th International Colloquium on Signal Processing and its Applications*, pages 451–455. IEEE, 2012.
- [146] Jeyaraman Saraswathy, Muthusamy Hariharan, Wan Khairunizam, Sazali Yaacob, and N Thiyagar. Infant cry classification: time frequency analysis. In *2013 IEEE International Conference on Control System, Computing and Engineering*, pages 499–504. IEEE, 2013.
- [147] Elisabeth Scheiner, Kurt Hammerschmidt, Uwe Jürgens, and Petra Zwirner. Acoustic analyses of developmental changes and emotional expression in the preverbal vocalizations of infants. *Journal of Voice*, 16(4):509–529, 2002.
- [148] Elisabeth Scheiner, Kurt Hammerschmidt, Uwe Jürgens, and Petra Zwirner. The influence of hearing impairment on preverbal emotional vocalizations of infants. *Folia phoniatrica et logopaedica*, 56(1):27–40, 2004.
- [149] R Schönweiler, S Kaese, S Möller, A Rinscheid, and M Ptok. Neuronal networks and self-organizing maps: new computer techniques in the acoustic evaluation of the infant cry. *International journal of pediatric otorhinolaryngology*, 38(1):1–11, 1996.
- [150] Vincenzo Paolo Senese, Paola Venuti, Francesca Giordano, Maria Napolitano, Gianluca Esposito, and Marc H Bornstein. Adults’ implicit associations to infant positive and negative acoustic cues: moderation by empathy and gender. *The Quarterly Journal of Experimental Psychology*, 70(9):1935–1942, 2017.
- [151] Stephen J Sheinkopf, Jana M Iverson, Melissa L Rinaldi, and Barry M Lester. Atypical cry acoustics in 6-month-old infants at risk for autism spectrum disorder. *Autism Research*, 5(5):331–339, 2012.
- [152] Stephen J Sheinkopf, Giulia Righi, Carmen J Marsit, and Barry M Lester. Methylation of the glucocorticoid receptor (nr3c1) in placenta is associated with infant cry acoustics. *Frontiers in Behavioral Neuroscience*, 10:100, 2016.
- [153] Yuta Shinya, Masahiko Kawai, Fusako Niwa, and Masako Myowa-Yamakoshi. Preterm birth is associated with an increased fundamental frequency of spontaneous crying in human infants at term-equivalent age. *Biology letters*, 10(8):20140350, 2014.
- [154] Mitchell Silva, Bogdan Mijovic, Bea RH Van den Bergh, Karel Allegaert, Jean-Marie Aerts, Sabine Van Huffel, and Daniel Berckmans. Decoupling between fundamental frequency and energy envelope of neonate cries. *Early human development*, 86(1):35–40, 2010.
- [155] Avinash Kumar Singh, Jayanta Mukhopadhyay, and K Sreenivasa Rao. Classification of infant cries using epoch and spectral features. In *2013 National Conference on Communications (NCC)*, pages 1–5. IEEE, 2013.
- [156] Renata Sisto, Carlo Valerio Bellieni, S Perrone, and Giuseppe Buonocore. Neonatal pain analyzer: development and validation. *Medical and Biological Engineering and Computing*, 44(10):841, 2006.
- [157] Ian St James-Roberts. What is distinct about infants’ “colic” cries? *Archives of disease in childhood*, 80(1):56–62, 1999.
- [158] Bonnie J Stevens, C Celeste Johnston, and Linda Horton. Factors that influence the behavioral pain responses of premature infants. *Pain*, 59(1):101–109, 1994.
- [159] Adam Michael Stewart, Gregory F Lewis, Keri J Heilman, Maria I Davila, Danielle D Coleman, Stephanie A Aylward, and Stephen W Porges. The covariation of acoustic features of infant cries and autonomic state. *Physiology & behavior*, 120:203–210, 2013.
- [160] Tanja Etz, Henning Reetz, Carla Wegener, and Franz Bahlmann. Infant cry reliability: acoustic homogeneity of spontaneous cries and pain-induced cries. *Speech Communication*, 58:91–100, 2014.

- [161] S Tejaswini, Natarajan Sriraam, and GCM Pradeep. Recognition of infant cries using wavelet derived mel frequency feature with svm classification. In *2016 International Conference on Circuits, Controls, Communications and Computing (I4C)*, pages 1–4. IEEE, 2016.
- [162] Lisa M Unwin, Ildiko Bruz, Murray T Maybery, Victoria Reynolds, Natalie Ciccone, Cheryl Dissanayake, Martha Hickey, and Andrew JO Whitehouse. Acoustic properties of cries in 12-month old infants at high-risk of autism spectrum disorder. *Journal of autism and developmental disorders*, 47(7):2108–2119, 2017.
- [163] G Jr Varallyay, Zoltán Benyó, András Illényi, Zs Farkas, and Levente Kovács. Acoustic analysis of the infant cry: classical and new methods. In *The 26th Annual International Conference of the IEEE Engineering in Medicine and Biology Society*, volume 1, pages 313–316. IEEE, 2004.
- [164] György Várallyay Jr, András Illényi, Zoltán Benyó, Zsolt Farkas, and Gábor Katona. An attempt to detect hearing disorders by acoustic features of the infant cry. In *Proc. Forum Acusticum*, 2005.
- [165] György Várallyay, Zoltán Benyó, András Illényi, and Zsolt Farkas. Development of new algorithms for the analysis of acoustic biomedical signals. In *3rd IASTED International Conference on Medical Engineering 2005*, pages 434–438, 2005.
- [166] György Várallyay. Future prospects of the application of the infant cry in the medicine. *Periodica Polytechnica Electrical Engineering*, 50(1-2):47–62, 2006.
- [167] Gyorgy Varallyay and Zoltán Benyó. Melody shape-a suggested novel attribute for the biomedical analysis of the infant cry. In *Engineering in Medicine and Biology Society, 2007. EMBS 2007. 29th Annual International Conference of the IEEE*, pages 4119–4122. IEEE, 2007.
- [168] Paola Venuti, Andrea Caria, Gianluca Esposito, Nicola De Pisapia, Marc H Bornstein, and Simona de Falco. Differential brain responses to cries of infants with autistic disorder and typical development: An fmri study. *Research in developmental disabilities*, 33(6):2255–2264, 2012.
- [169] Betty R Vohr, Lester Barry, Gherardo Rapisardi, Catherine O’Dea, Lucy Brown, Mark Peucker, William Cashore, and William Oh. Abnormal brain-stem function (brain-stem auditory evoked response) correlates with acoustic cry features in term infants with hyperbilirubinemia. *The Journal of pediatrics*, 115(2):303–308, 1989.
- [170] NSA Wahid, P Saad, and M Hariharan. Automatic infant cry pattern classification for a multiclass problem. *Journal of Telecommunication, Electronic and Computer Engineering (JTEC)*, 8(9):45–52, 2016.
- [171] Kathleen Wermke, W Mende, C Manfredi, and P Brusciaglion. Developmental aspects of infant’s cry melody and formants. *Medical engineering & physics*, 24(7-8):501–514, 2002.
- [172] Kathleen Wermke, Christine Hauser, Gerda Komposch, and Angelika Stellzig. Spectral analysis of prespeech sounds (spontaneous cries) in infants with unilateral cleft lip and palate (uclp): a pilot study. *The Cleft palate-craniofacial journal*, 39(3):285–294, 2002.
- [173] Kathleen Wermke and Michael P Robb. Fundamental frequency of neonatal crying: Does body size matter? *Journal of Voice*, 24(4):388–394, 2010.
- [174] Kathleen Wermke, Johanna Teiser, Eunice Yovsi, Paul Joscha Kohlenberg, Peter Wermke, Michael Robb, Heidi Keller, and Bettina Lamm. Fundamental frequency variation within neonatal crying: Does ambient language matter? *Speech, Language and Hearing*, 19(4):211–217, 2016.
- [175] Kathleen Wermke, Yufang Ruan, Yun Feng, Daniela Dobnig, Sophia Stephan, Peter Wermke, Li Ma, Hongyu Chang, Youyi Liu, Volker Hesse, et al. Fundamental frequency variation in crying of mandarin and german neonates. *Journal of Voice*, 31(2):255–e25, 2017.
- [176] Qiaobing Xie, Rabab K Ward, and Charles A Laszlo. Automatic assessment of infants’ levels-of-distress from the cry signals. *IEEE transactions on speech and audio processing*, 4(4):253, 1996.
- [177] Philip Sanford Zeskind and Barry M Lester. Acoustic features and auditory perceptions of the cries of newborns with prenatal and perinatal complications. *Child development*, pages 580–589, 1978.
- [178] Philip Sanford Zeskind and Ronald G Barr. Acoustic characteristics of naturally occurring cries of infants with “colic”. *Child development*, 68(3):394–403, 1997.
- [179] Philip Sanford Zeskind, Matthew S McMurray, Kristin Ann Garber, Juliana Miriam Neuspiel, Elizabeth Thomas Cox, Karen M Grewen, Linda C Mayes, and Josephine M Johns. Development of translational methods in spectral analysis of human infant crying and rat pup ultrasonic vocalizations for early neurobehavioral assessment. *Frontiers in psychiatry*, 2:56, 2011.

- [180] Philip Sanford Zeskind, Matthew S McMurray, Elizabeth T Cox Lippard, Karen M Grewen, Kristin A Garber, and Josephine M Johns. Translational analysis of effects of prenatal cocaine exposure on human infant cries and rat pup ultrasonic vocalizations. *PloS one*, 9(10):e110349, 2014.
